# Supplementary material for: A Systems Biology Approach to Transcription Factor Binding Site Prediction
Source: PubMed Central journal article supplement (PMC2845628; doi:10.1371/journal.pone.0009878), 2010-03-26
Supplement: pone.0009878.s001.pdf [file pone.0009878.s001.pdf]

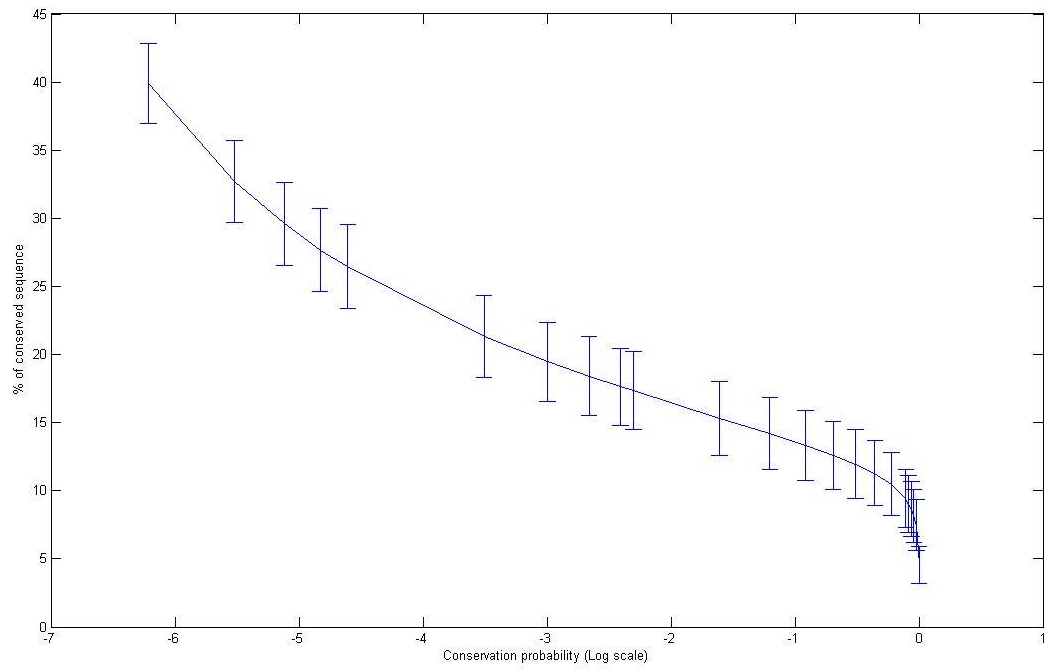

**Supplementary Figure 1.** phastCons conservation probabilities and corresponding conserved-sequence proportions.
