# Supplementary material for: A Systems Biology Approach to Transcription Factor Binding Site Prediction
Source: PubMed Central journal article supplement (PMC2845628; doi:10.1371/journal.pone.0009878), 2010-03-26
Supplement: pone.0009878.s003.pdf [file pone.0009878.s003.pdf]

| TF   | Source | Err  | Sens | Spec | <i>p</i> -val | Logo |
|------|--------|------|------|------|---------------|------|
| BCL6 | Cons   | 0.29 | 0.73 | 0.68 | 0.00          |      |
| BCL6 | Cons   | 0.30 | 0.80 | 0.60 | 0.00          |      |
| BCL6 | Cons   | 0.30 | 0.80 | 0.59 | 0.00          |      |

| TF     | Source | Err  | Sens | Spec | <i>p</i> -val | Logo |
|--------|--------|------|------|------|---------------|------|
| NFATC1 | Cons   | 0.27 | 0.78 | 0.69 | 0.00          |      |
| NFATC1 | Cons   | 0.27 | 0.75 | 0.71 | 0.00          |      |
| NFATC1 | Cons   | 0.27 | 0.72 | 0.73 | 0.00          |      |

| TF   | Source | Err  | Sens | Spec | <i>p</i> -val | Logo |
|------|--------|------|------|------|---------------|------|
| NME2 | Cons   | 0.28 | 0.72 | 0.72 | 0.00          |      |
| NME2 | Cons   | 0.30 | 0.73 | 0.68 | 0.00          |      |

| TF  | Source | Err  | Sens | Spec | <i>p</i> -val | Logo |
|-----|--------|------|------|------|---------------|------|
| RB1 | Cons   | 0.26 | 0.92 | 0.57 | 0.00          |      |
| RB1 | Cons   | 0.28 | 0.70 | 0.73 | 0.00          |      |
| RB1 | Cons   | 0.28 | 0.73 | 0.70 | 0.00          |      |

| TF   | Source | Err  | Sens | Spec | <i>p</i> -val | Logo      |
|------|--------|------|------|------|---------------|-----------|
| VAV1 | Cons   | 0.24 | 0.81 | 0.71 | 0.00          | AGGAAG    |
| VAV1 | Cons   | 0.24 | 0.76 | 0.76 | 0.00          | GGGAAGGAG |
| VAV1 | Cons   | 0.25 | 0.78 | 0.73 | 0.00          | AGGAAGC   |

| TF     | Source | Err  | Sens | Spec | <i>p</i> -val | Logo        |
|--------|--------|------|------|------|---------------|-------------|
| NFE2L2 | Cons   | 0.28 | 0.91 | 0.54 | 0.00          | CCC GCCACC  |
| NFE2L2 | Cons   | 0.28 | 0.70 | 0.74 | 0.00          | GAA C ATGGC |
| NFE2L2 | Cons   | 0.29 | 0.97 | 0.45 | 0.00          | CCAGGGCG    |

| TF    | Source | Err  | Sens | Spec | <i>p</i> -val | Logo       |
|-------|--------|------|------|------|---------------|------------|
| MECP2 | Cons   | 0.23 | 0.85 | 0.68 | 0.00          | CCTCCGCCAC |
| MECP2 | Cons   | 0.25 | 0.96 | 0.55 | 0.00          | TCCGCCCC   |
| MECP2 | Cons   | 0.25 | 0.70 | 0.80 | 0.00          | TGGCGGGAG  |

| TF   | Source | Err  | Sens | Spec | <i>p</i> -val | Logo                |
|------|--------|------|------|------|---------------|---------------------|
| FLI1 | Orig   | 0.28 | 0.69 | 0.75 | 0.00          | CA T T T T A T T    |
| FLI1 | Orig   | 0.30 | 0.66 | 0.75 | 0.00          | T C T T C C C A A C |
| FLI1 | Orig   | 0.30 | 0.77 | 0.64 | 0.00          | C T G C A T T C C   |

| TF     | Source | Err  | Sens | Spec | <i>p</i> -val | Logo |
|--------|--------|------|------|------|---------------|------|
| HOXD13 | Cons   | 0.32 | 0.73 | 0.63 | 0.00          |      |
| HOXD13 | Cons   | 0.32 | 0.73 | 0.63 | 0.00          |      |
| HOXD13 | Cons   | 0.32 | 0.60 | 0.75 | 0.00          |      |

| TF    | Source | Err  | Sens | Spec | <i>p</i> -val | Logo |
|-------|--------|------|------|------|---------------|------|
| HIF1A | Cons   | 0.27 | 0.71 | 0.76 | 0.00          |      |
| HIF1A | Cons   | 0.30 | 0.83 | 0.57 | 0.00          |      |
| HIF1A | Cons   | 0.30 | 0.80 | 0.59 | 0.00          |      |

| TF  | Source | Err  | Sens | Spec | <i>p</i> -val | Logo |
|-----|--------|------|------|------|---------------|------|
| ID1 | Cons   | 0.31 | 0.83 | 0.54 | 0.00          |      |
| ID1 | Cons   | 0.32 | 0.68 | 0.69 | 0.00          |      |
| ID1 | Orig   | 0.33 | 0.58 | 0.77 | 0.00          |      |

| TF    | Source | Err  | Sens | Spec | <i>p</i> -val | Logo |
|-------|--------|------|------|------|---------------|------|
| MEF2C | Orig   | 0.29 | 0.77 | 0.64 | 0.00          |      |
| MEF2C | Cons   | 0.31 | 0.77 | 0.61 | 0.00          |      |
| MEF2C | Cons   | 0.32 | 0.69 | 0.67 | 0.00          |      |

| TF   | Source | Err  | Sens | Spec | <i>p</i> -val | Logo |
|------|--------|------|------|------|---------------|------|
| PAX7 | Cons   | 0.32 | 0.71 | 0.65 | 0.00          |      |
| PAX7 | Cons   | 0.33 | 0.72 | 0.62 | 0.00          |      |
| PAX7 | Orig   | 0.33 | 0.75 | 0.60 | 0.05          |      |

| TF   | Source | Err  | Sens | Spec | <i>p</i> -val | Logo |
|------|--------|------|------|------|---------------|------|
| TBX1 | Cons   | 0.25 | 0.74 | 0.76 | 0.00          |      |
| TBX1 | Cons   | 0.25 | 0.77 | 0.72 | 0.00          |      |
| TBX1 | Cons   | 0.27 | 0.74 | 0.72 | 0.00          |      |

| TF  | Source | Err  | Sens | Spec | <i>p</i> -val | Logo |
|-----|--------|------|------|------|---------------|------|
| MLL | Cons   | 0.32 | 0.76 | 0.60 | 0.00          |      |
| MLL | Cons   | 0.32 | 0.75 | 0.61 | 0.00          |      |
| MLL | Cons   | 0.33 | 0.88 | 0.47 | 0.00          |      |

| TF  | Source | Err  | Sens | Spec | <i>p</i> -val | Logo |
|-----|--------|------|------|------|---------------|------|
| APC | Cons   | 0.26 | 0.78 | 0.71 | 0.00          |      |
| APC | Cons   | 0.27 | 0.74 | 0.71 | 0.01          |      |
| APC | Cons   | 0.28 | 0.63 | 0.81 | 0.02          |      |

| TF    | Source | Err  | Sens | Spec | <i>p</i> -val | Logo |
|-------|--------|------|------|------|---------------|------|
| CEBPZ | Cons   | 0.27 | 0.72 | 0.75 | 0.00          |      |
| CEBPZ | Cons   | 0.27 | 0.84 | 0.61 | 0.00          |      |
| CEBPZ | Cons   | 0.28 | 0.73 | 0.72 | 0.00          |      |

| TF    | Source | Err  | Sens | Spec | <i>p</i> -val | Logo |
|-------|--------|------|------|------|---------------|------|
| EP300 | Cons   | 0.26 | 0.84 | 0.65 | 0.00          |      |
| EP300 | Cons   | 0.26 | 0.80 | 0.68 | 0.05          |      |

| TF  | Source | Err  | Sens | Spec | <i>p</i> -val | Logo |
|-----|--------|------|------|------|---------------|------|
| MSC | Cons   | 0.32 | 0.70 | 0.67 | 0.00          |      |
| MSC | Cons   | 0.32 | 0.67 | 0.68 | 0.00          |      |
| MSC | Cons   | 0.33 | 0.68 | 0.67 | 0.00          |      |

| TF    | Source | Err  | Sens | Spec | <i>p</i> -val | Logo |
|-------|--------|------|------|------|---------------|------|
| PITX1 | Cons   | 0.25 | 0.83 | 0.67 | 0.00          |      |
| PITX1 | Cons   | 0.25 | 0.86 | 0.64 | 0.00          |      |
| PITX1 | Cons   | 0.25 | 0.86 | 0.63 | 0.00          |      |
